# Supplementary material for: Longstanding smoking associated with frontal brain lobe atrophy: a 32-year follow-up study in women
Source: HighWire-hosted journal article supplement (doi:10.1136/bmjopen-2023-072803), 2023-10-01
Supplement: bmjopen-2023-072803supp001_data_supplement.pdf [file bmjopen-2023-072803supp001_data_supplement.pdf]

**Additional file** Correlation matrix presenting Pearson correlation coefficient (95% CI) between the five outcome variables

|                        | Temporal lobe atrophy | Frontal lobe atrophy | Parietal lobe atrophy | Occipital lobe atrophy |
|------------------------|-----------------------|----------------------|-----------------------|------------------------|
| Frontal lobe atrophy   | 0.49 (0.41-0.57) ***  |                      |                       |                        |
| Parietal lobe atrophy  | 0.52 (0.44-0.59) ***  | 0.55 (0.47-0.62) *** |                       |                        |
| Occipital lobe atrophy | 0.54 (0.46-0.61) ***  | 0.48 (0.39-0.55) *** | 0.70 (0.64-0.75) ***  |                        |
| White matter lesions   | 0.23 (0.13-0.32) ***  | 0.15 (0.05-0.25) **  | 0.15 (0.05-0.25) **   | 0.21 (0.12-0.31) ***   |

The Pearson correlation coefficient (95% CI), \*\*\* = p value <0.001, \*\* = p value <0.01
